# Supplementary material
Source: PubMed Central journal article supplement (PMC5634772)

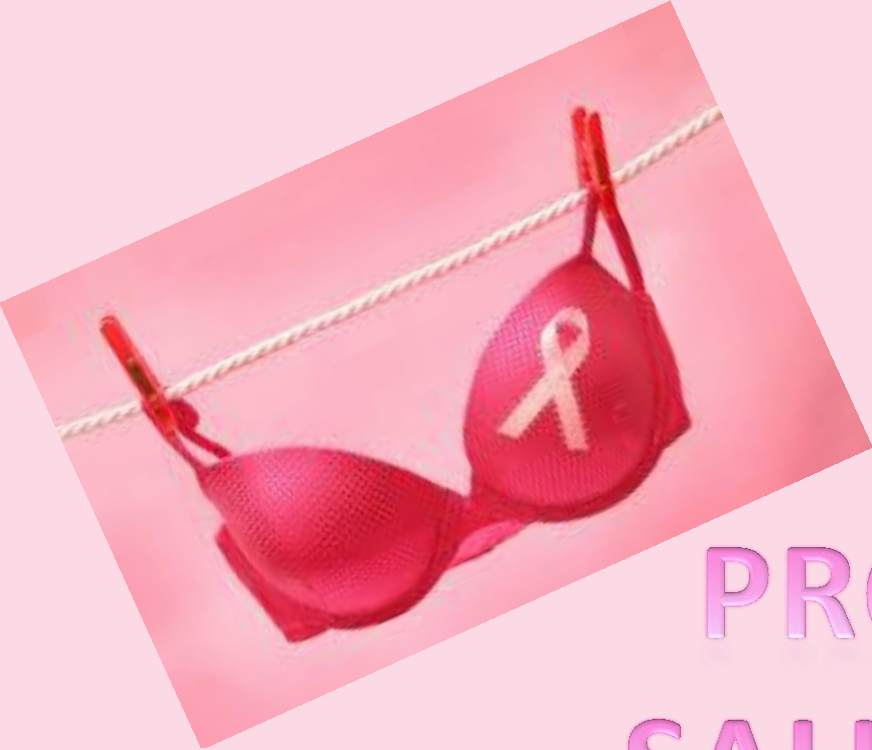

# PROGRAMA DE SALUD MAMARIA

## Bienvenidas

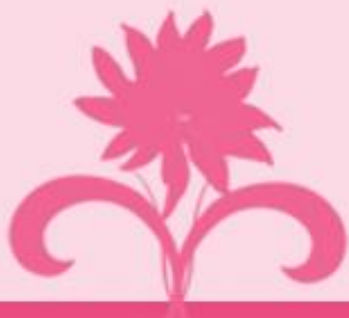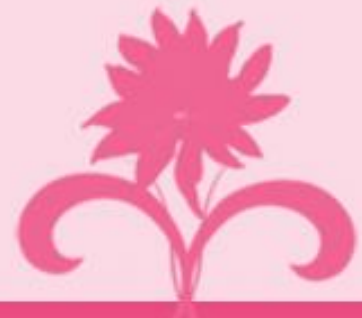

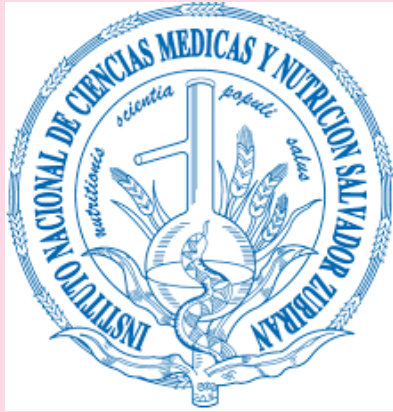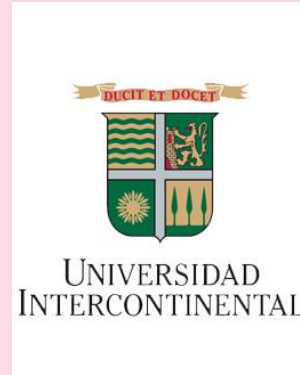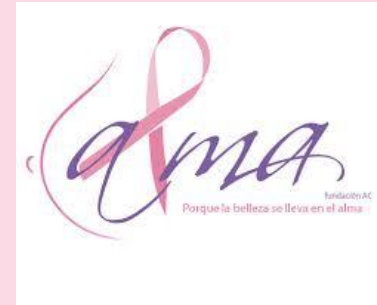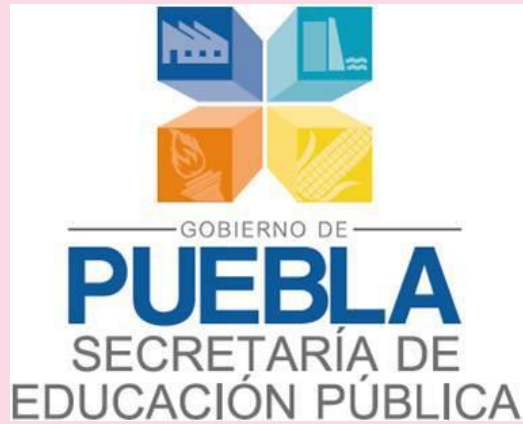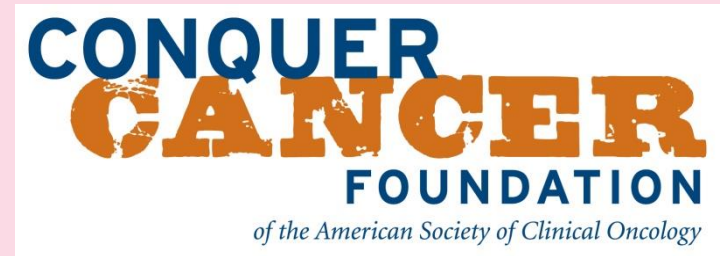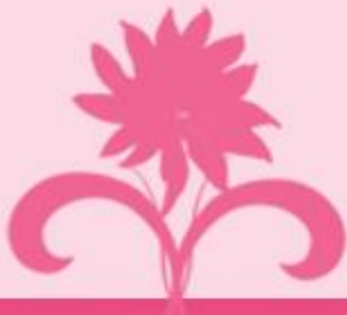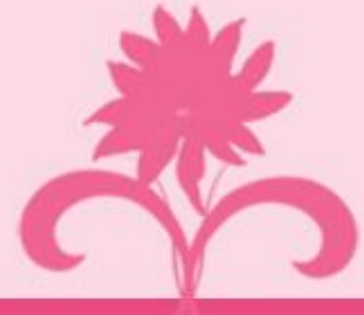

# introducción

¿Conocen a alguien con cáncer de mama?

¿Qué saben sobre cáncer de mama?

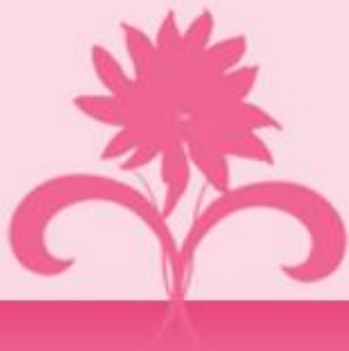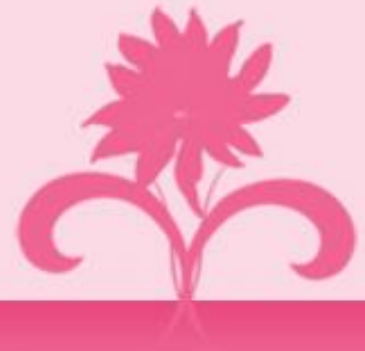

# Objetivos

- Conocer mas acerca de salud mamaria y cáncer de mama
- Discutir mitos y realidades sobre el cáncer de mama
- Conocer riesgos, detección temprana y lo importante de conocer su cuerpo y tomar decisiones saludables

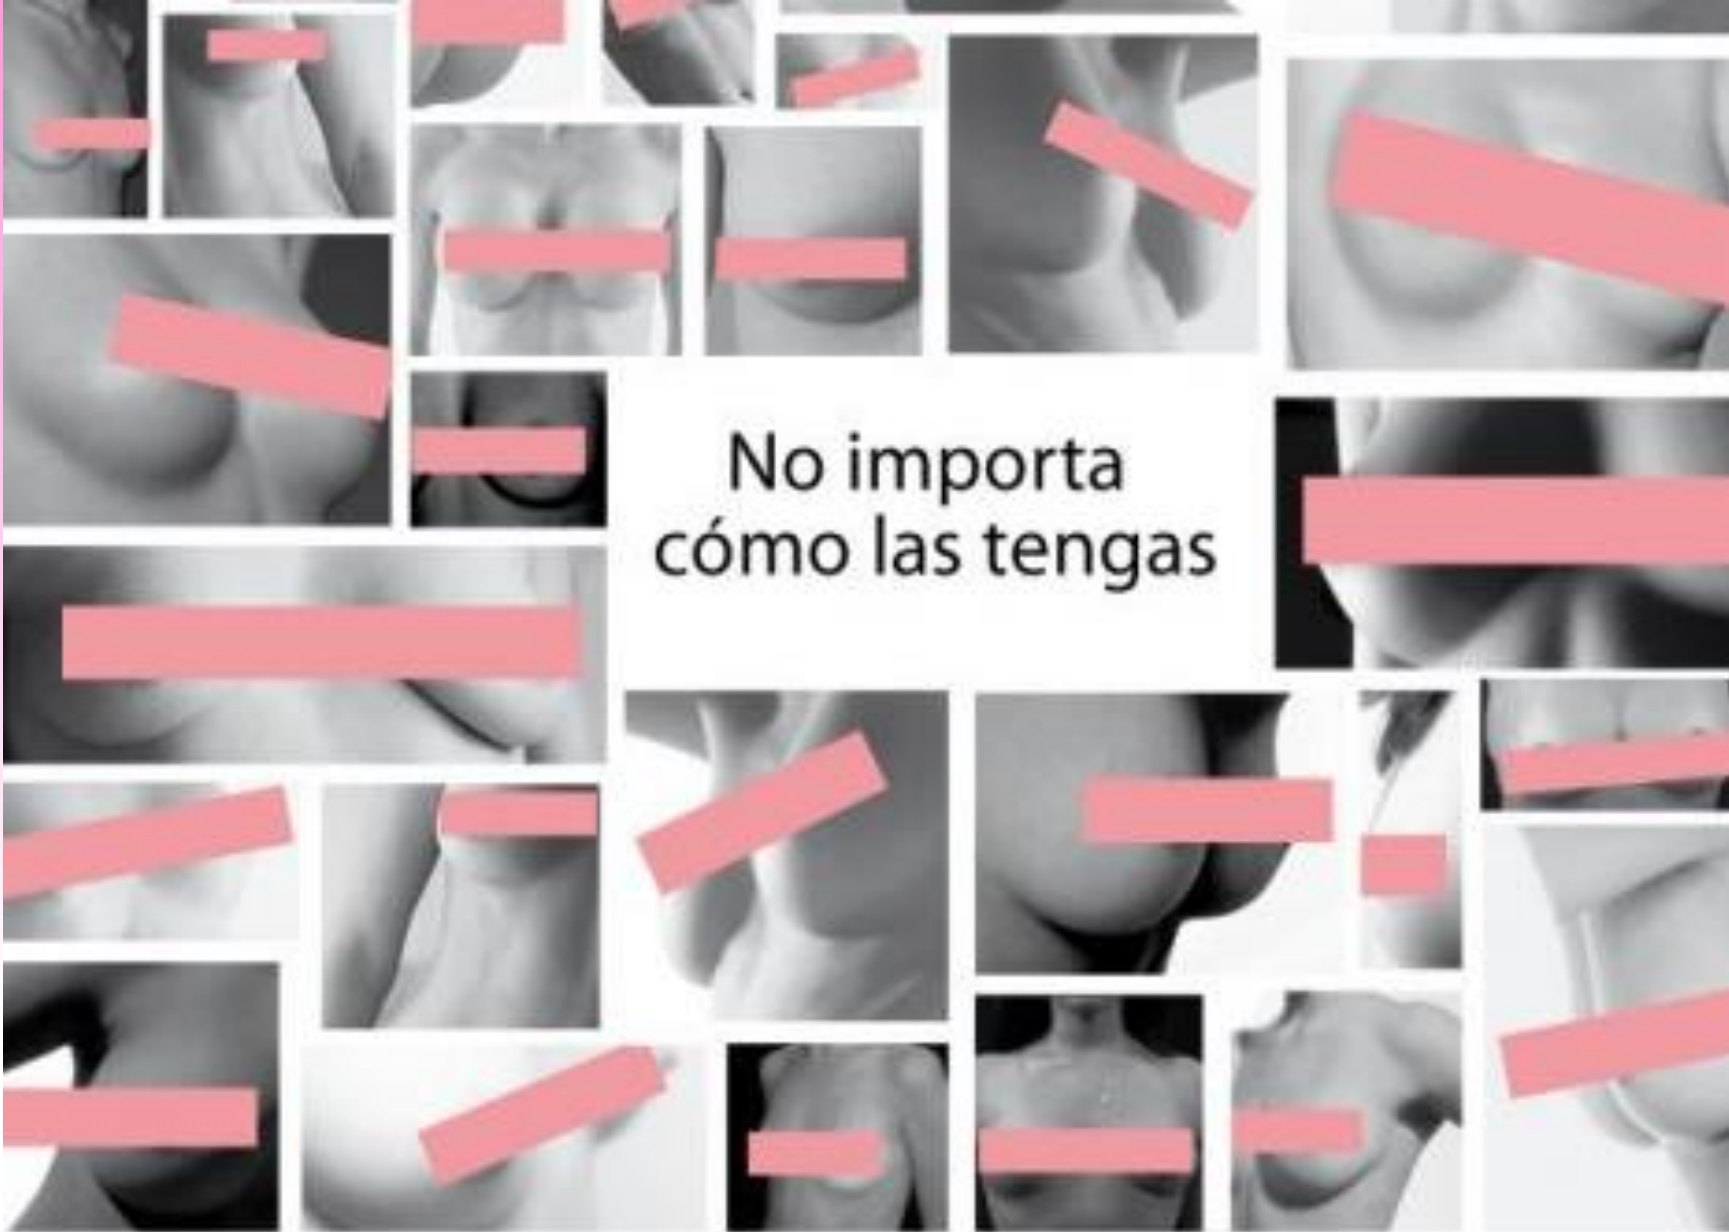

No importa  
cómo las tengas

*¿Qué es el cáncer de  
mama?*

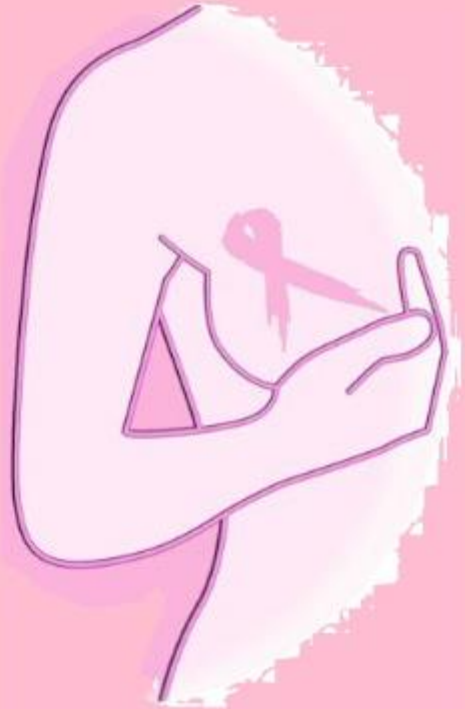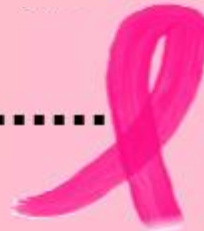

# Tumor vs Cáncer

Tumor

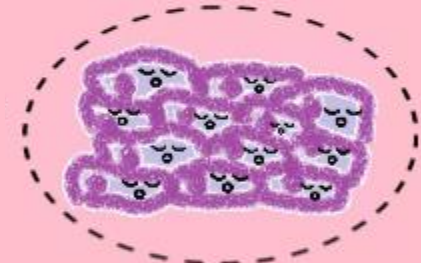

Cáncer

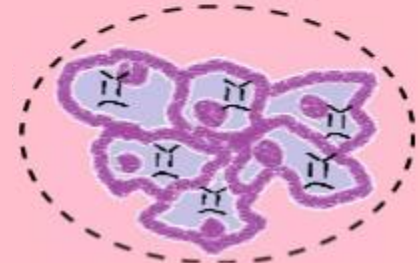



# ¿Qué es el cáncer de mama?

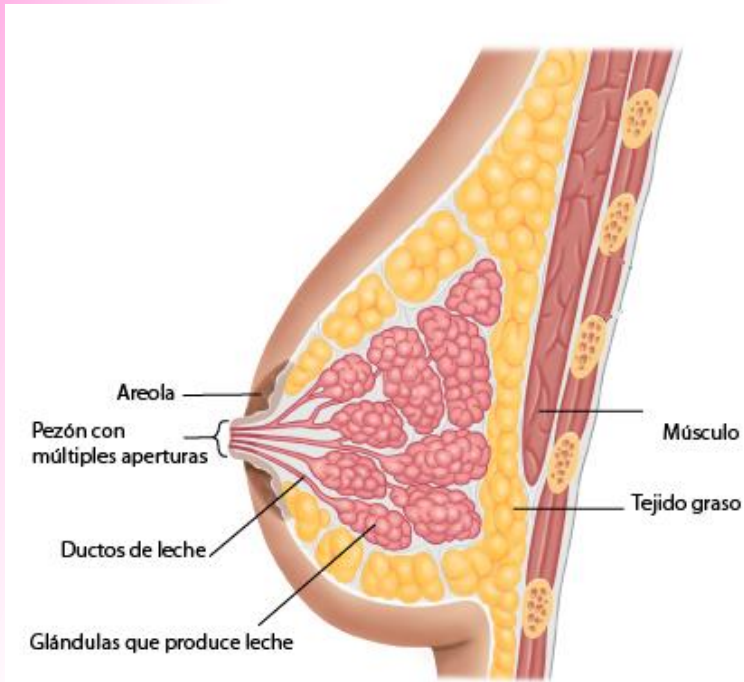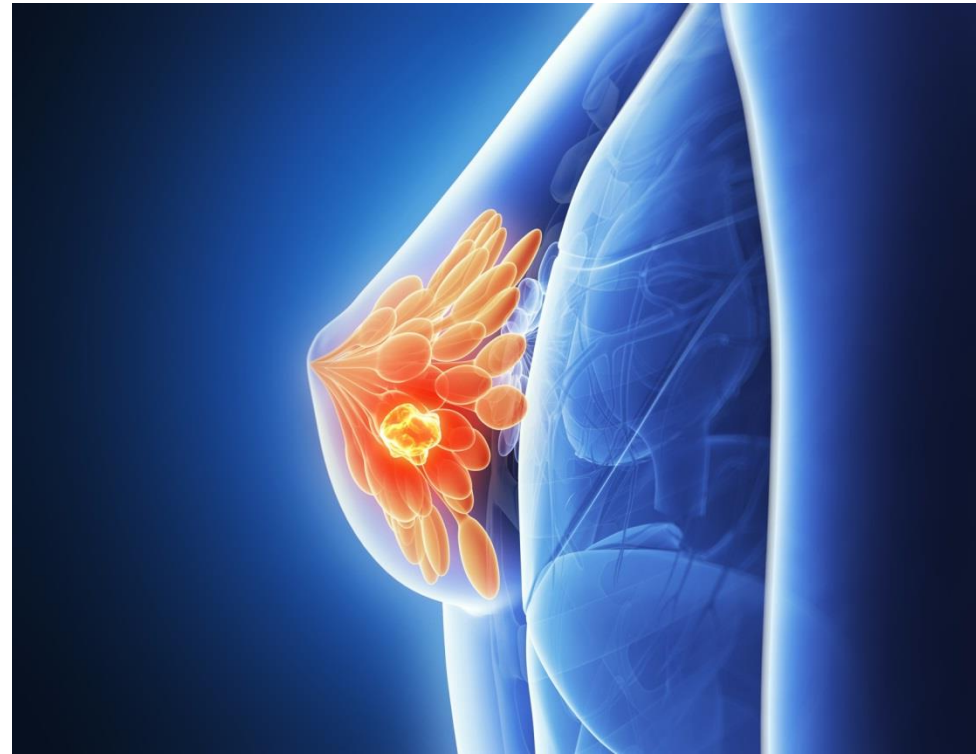



# Generalidades del cáncer de mama

- El cáncer de mama es el tumor maligno más frecuente a nivel mundial con 1.6 millones de casos por año.
- Es la principal causa de muerte por cáncer en mujeres a nivel mundial y en México.
- Puebla es el 5to lugar con más muertes por cáncer en México
- La edad de presentación en México es a los 50 años

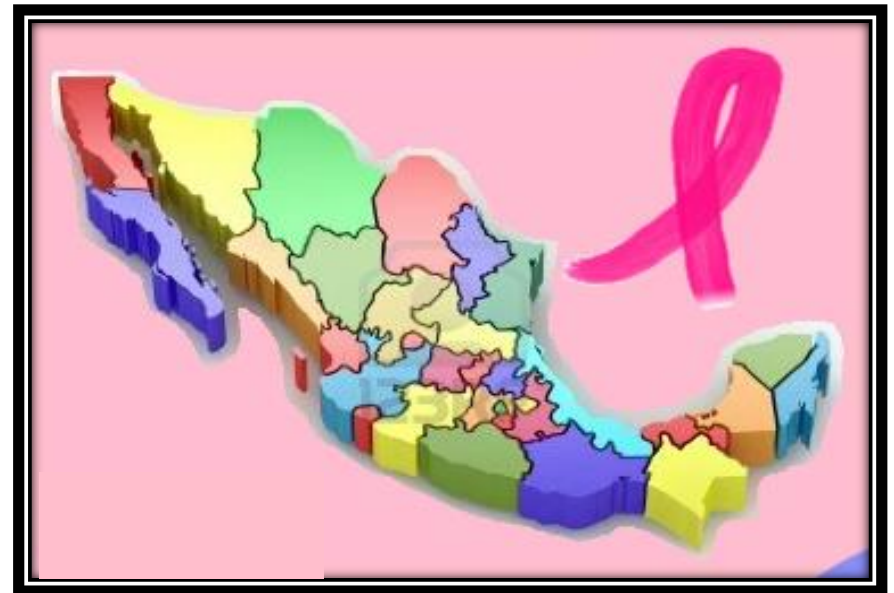

*¿Existen factores de riesgo para el Cáncer de Mama?*

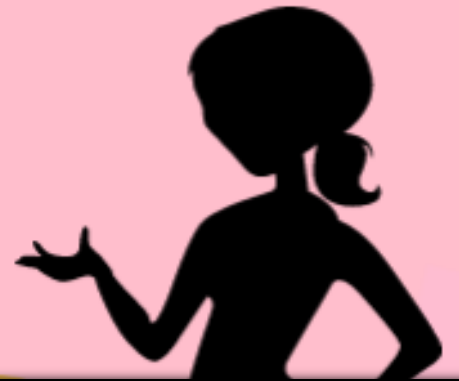

# Factores de riesgo que generan cáncer de mama

- **Edad**
- Historia familiar
- Obesidad
- Ser mujer
- Tener la menstruación muy joven
- No tener hijos
- Tener hijos a una edad avanzada
- No dar pecho a los bebés
- Tomar alcohol
- Fumar

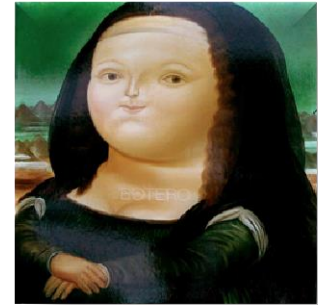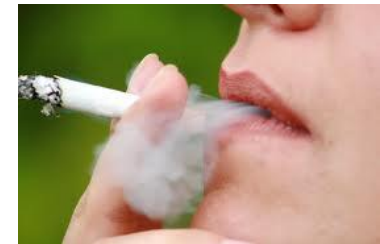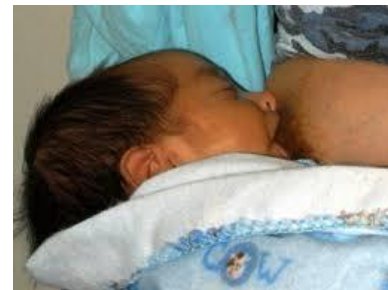

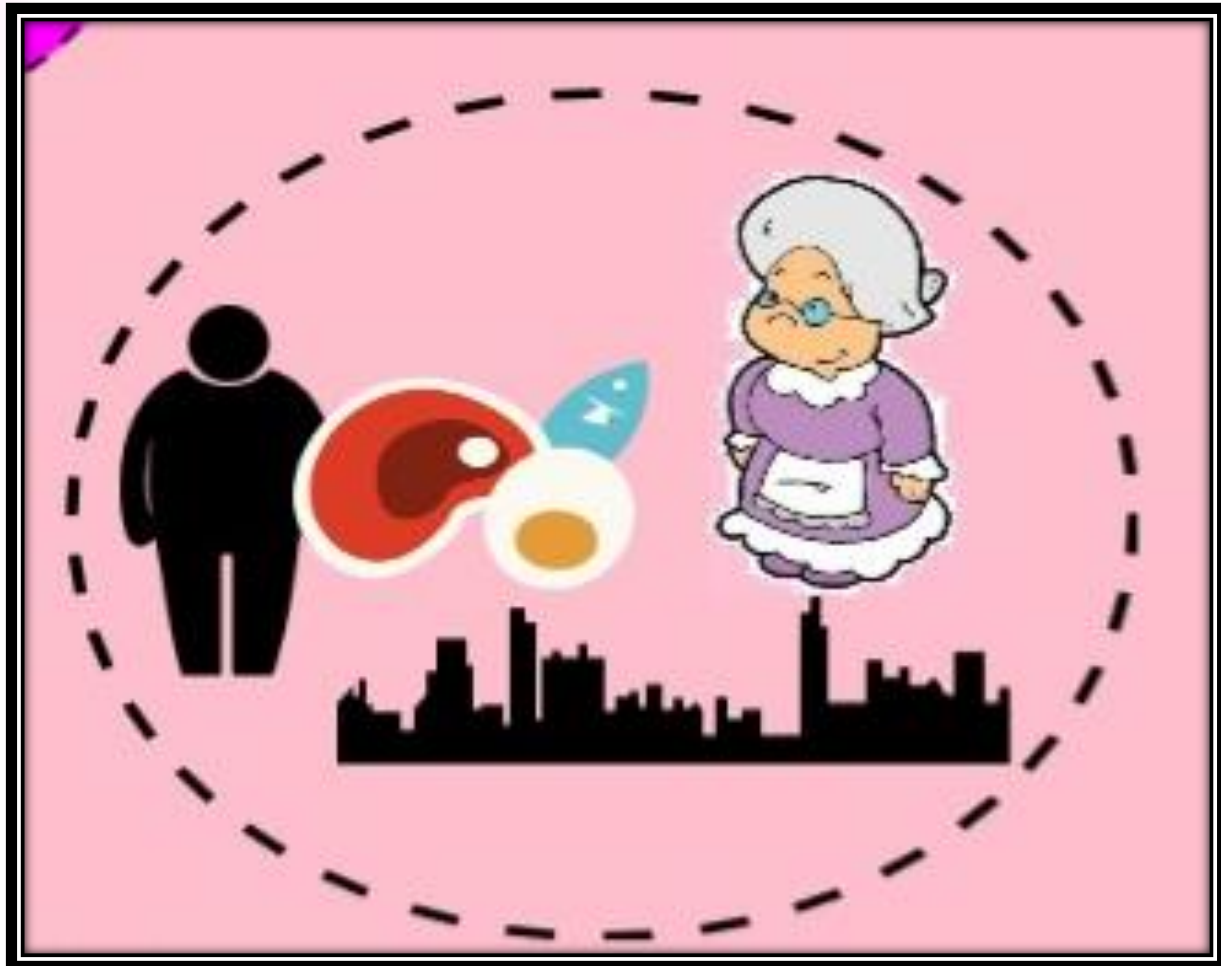

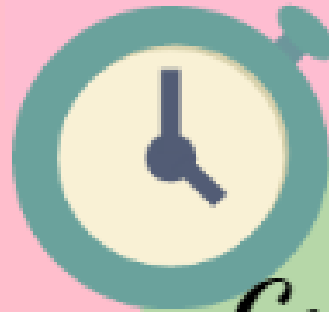

*Cada 2 horas  
fallece una  
mujer a  
causa del  
cáncer de  
mama.*

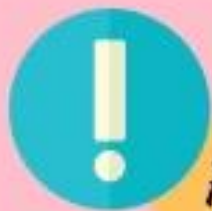

*Falta de programas  
de detección  
precoz, falta de  
servicios adecuados  
de diagnóstico y  
tratamiento.*

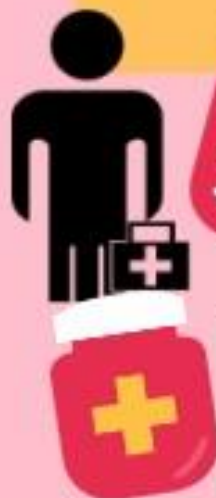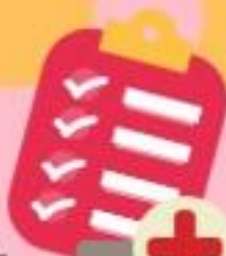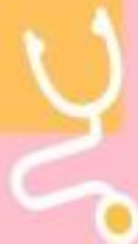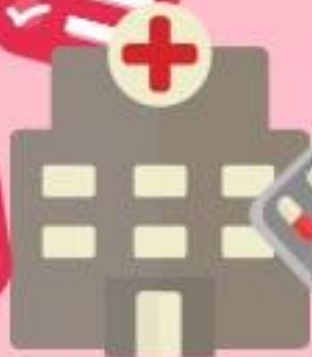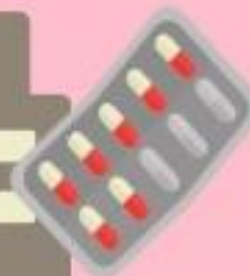



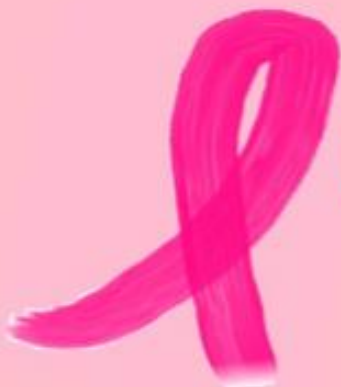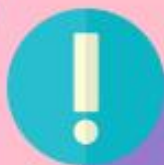

*"La detección precoz a fin de mejorar el pronóstico y la supervivencia de los casos de cáncer de mama sigue siendo la piedra angular de la lucha contra este cáncer."*

*Mensaje clave  
de la OMS*

*Existen 3 estrategias para la detección temprana del Cáncer de Mama*

# ¿Cómo cuidarnos?

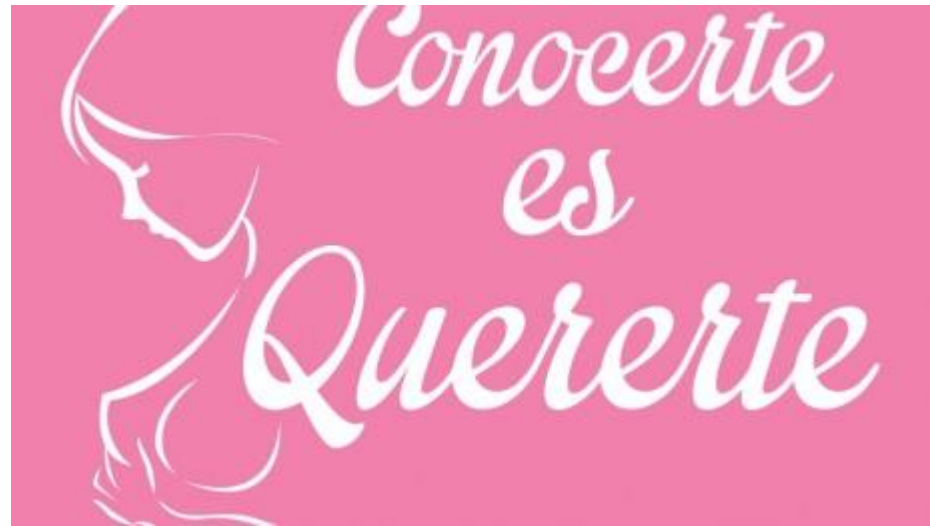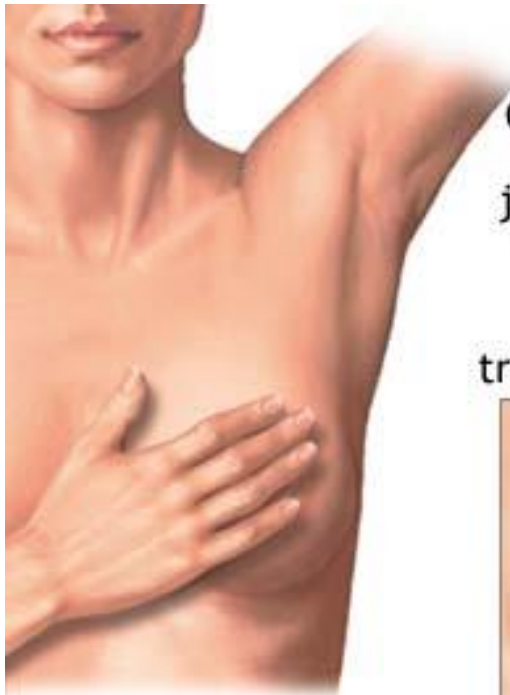

Con las puntas de los dedos juntas, palpar con gentileza cada seno en una de estas tres direcciones

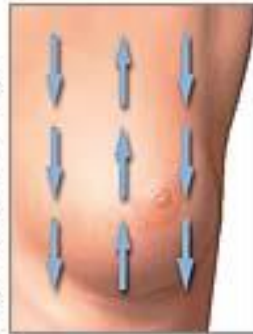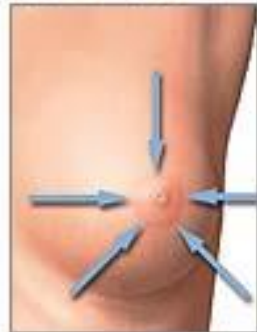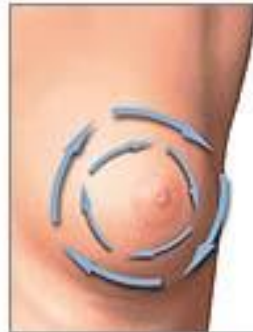

¿Qué es el examen clínico y cada cuánto tengo que hacerlo?

Autoexamen de seno:  
Inspección manual  
(de pie)

## Autoexploración

- A partir de los 20 años
- Identificación de cambios anormales
- Mensual

## Examen clínico

- Por personal capacitado
- A partir de los 20 años
- Cada 3 años

# Mastografía

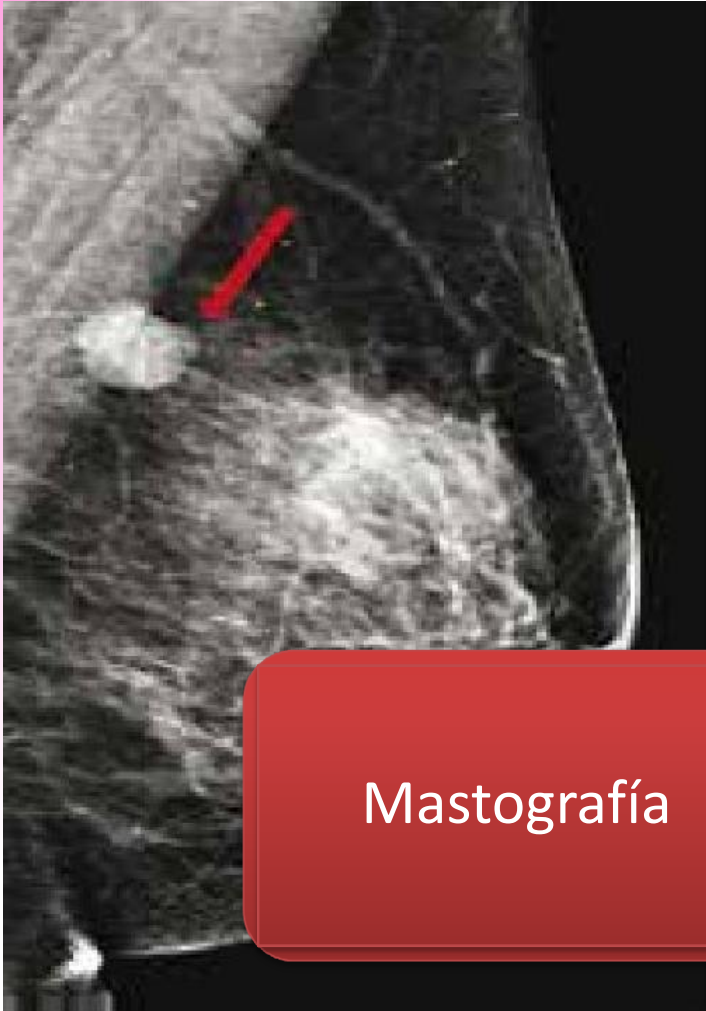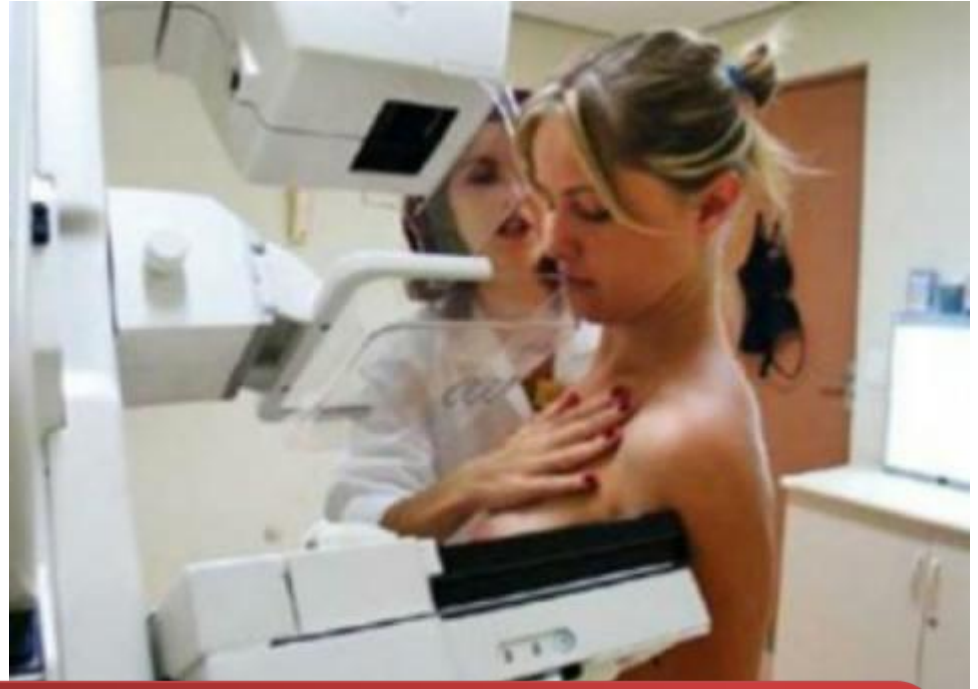

Mastografía

- Después de los 40 años
- Cada año

# AUTOEXPLORACIÓN

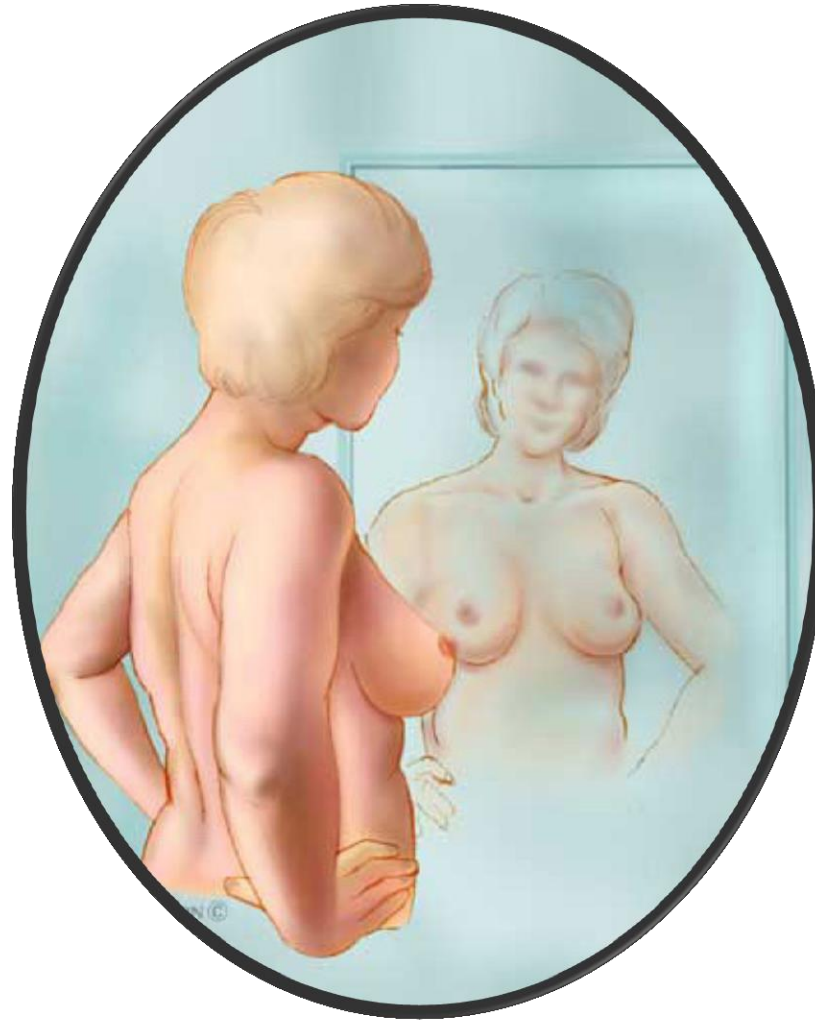



# AUTOEXPLORACIÓN

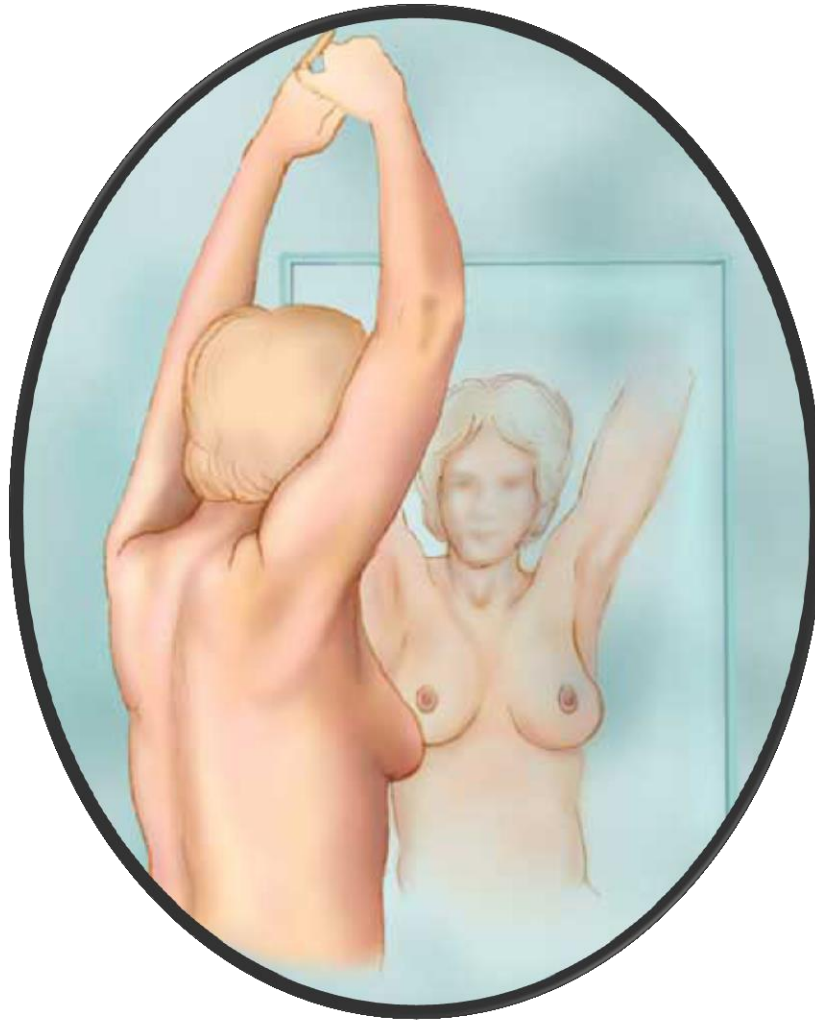

# AUTOEXPLORACIÓN

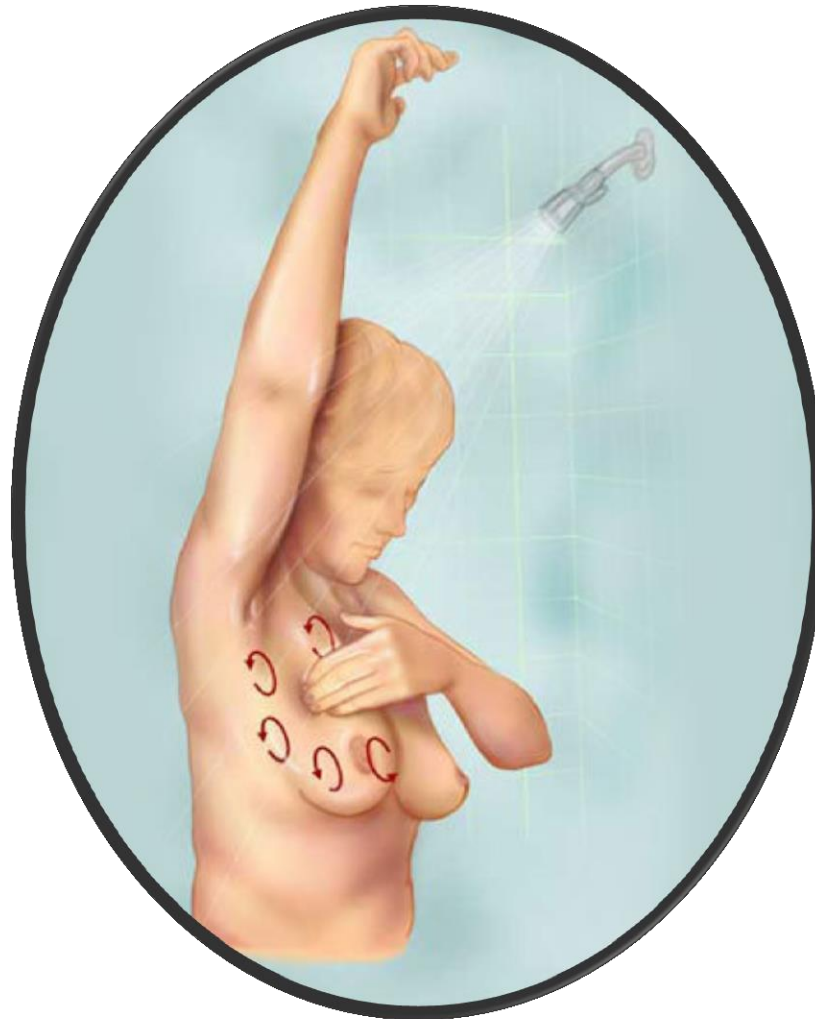

# AUTOEXPLORACIÓN

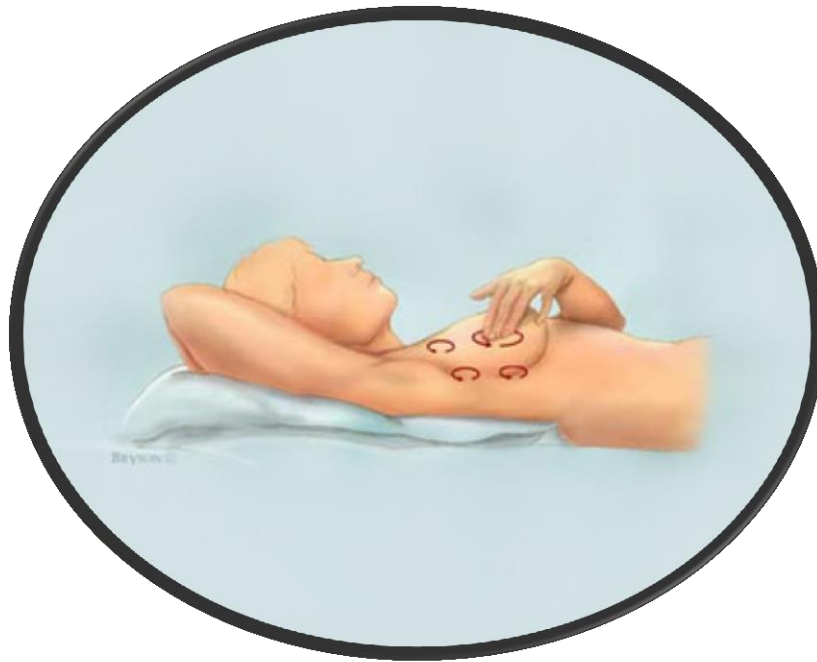

# ¿QUÉ DEBO BUSCAR?

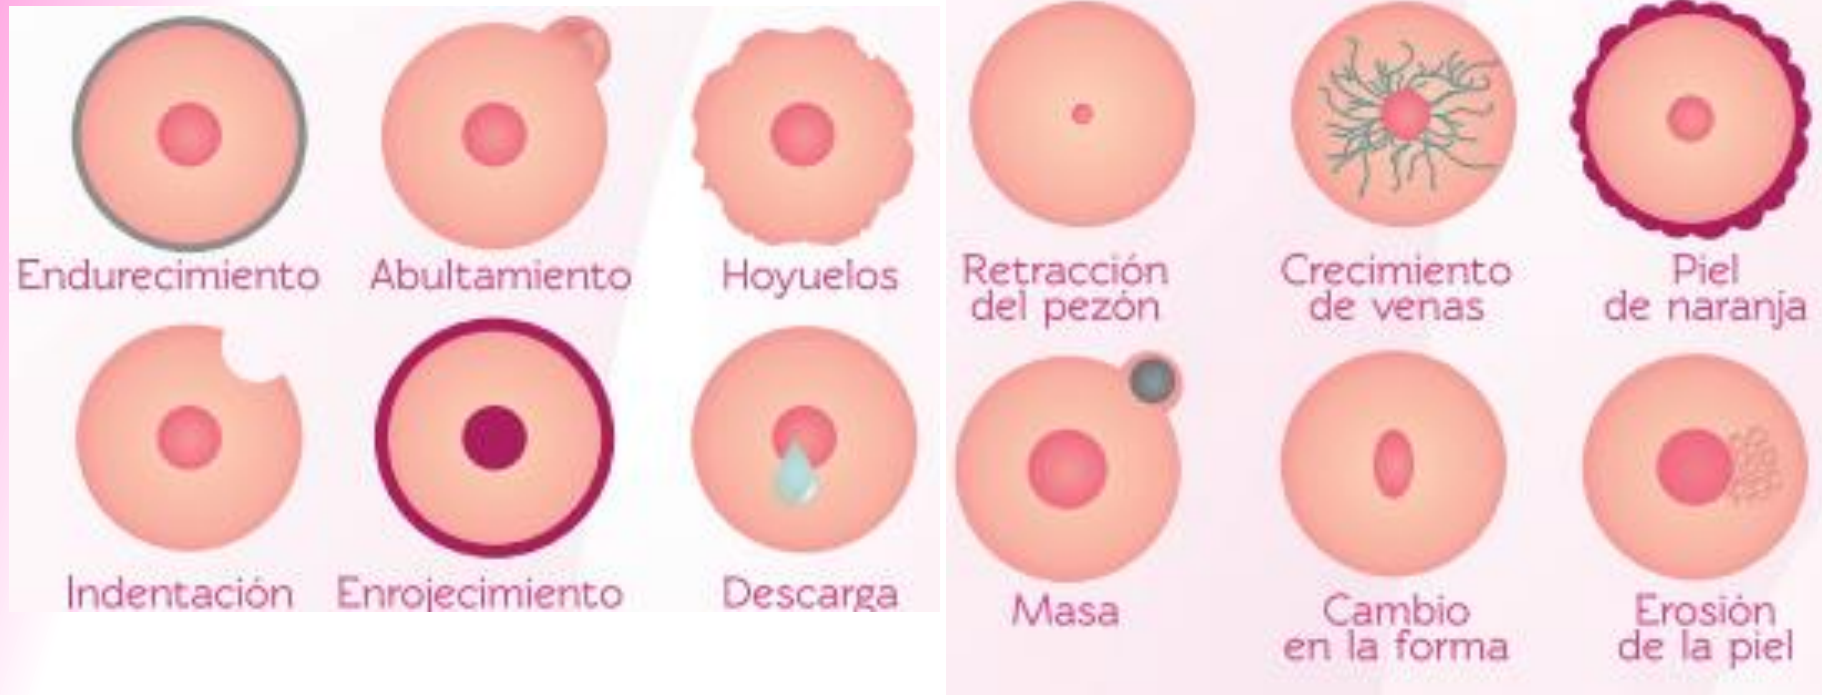

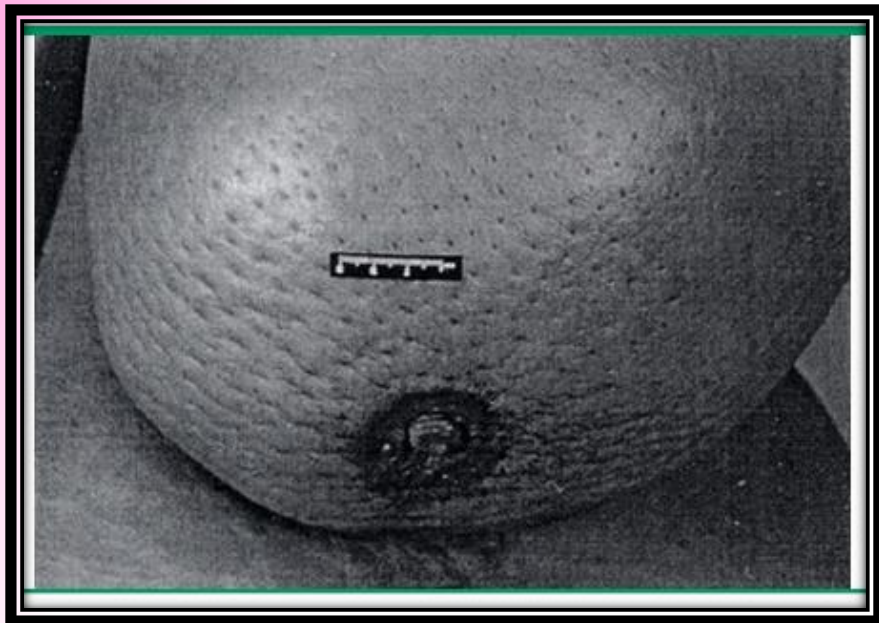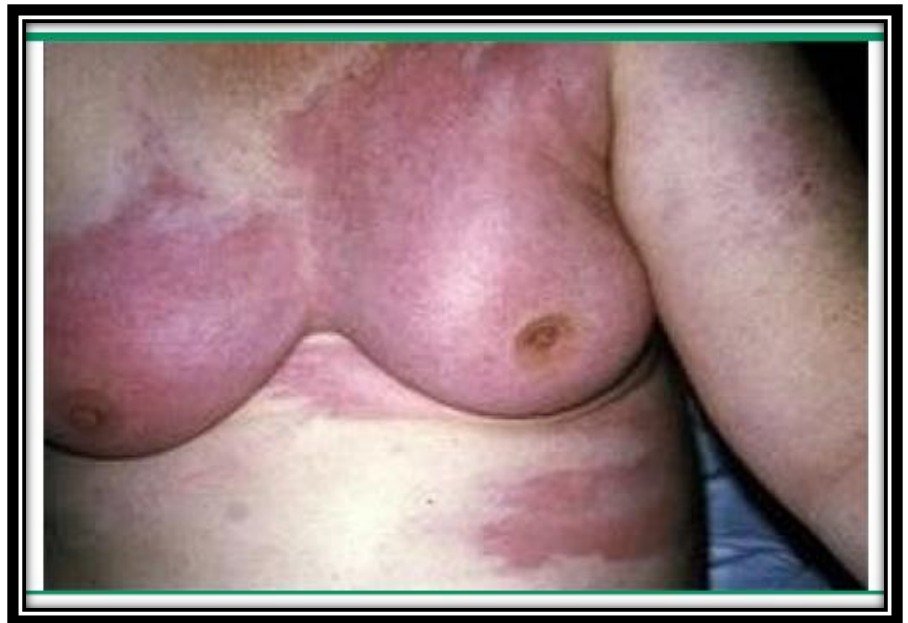

# Recomendaciones generales

Conocer lo normal para ti, e ir al doctor si notas algo raro

- Masas o bolitas en la mama o axila
- Aumento de volumen o cambios en la piel
- Comezón o cambios de la forma del pezón
- Salida de líquido del pezón

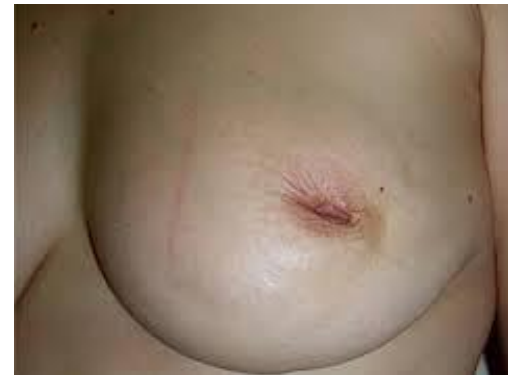



# BIOPSY

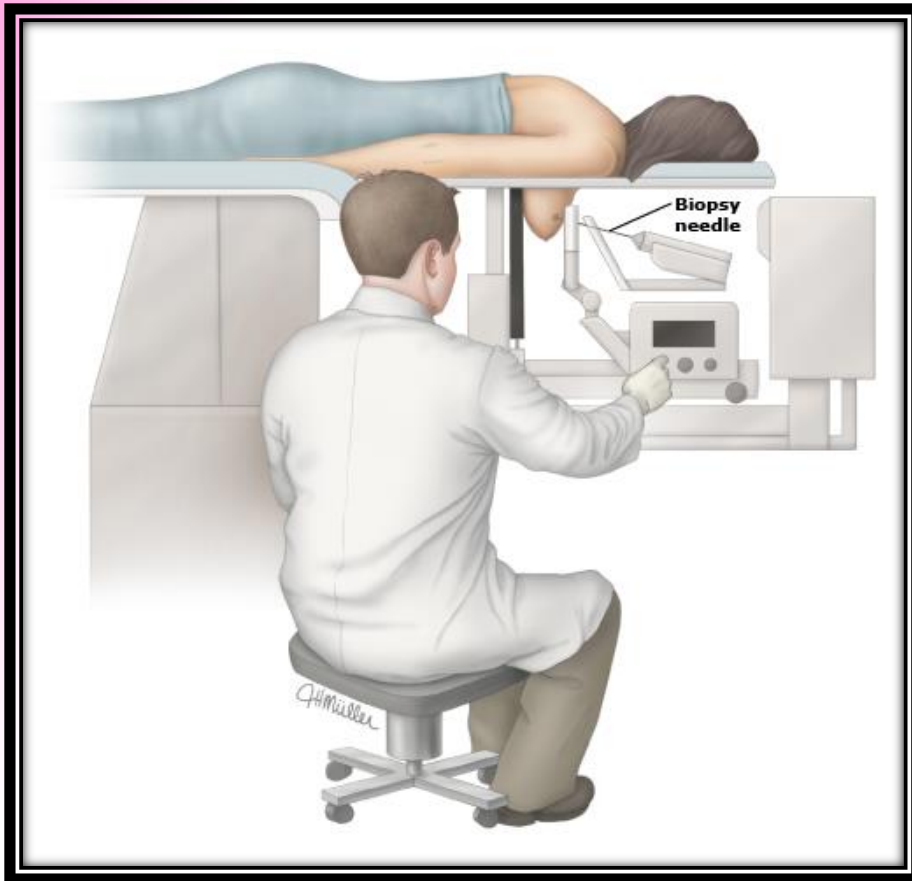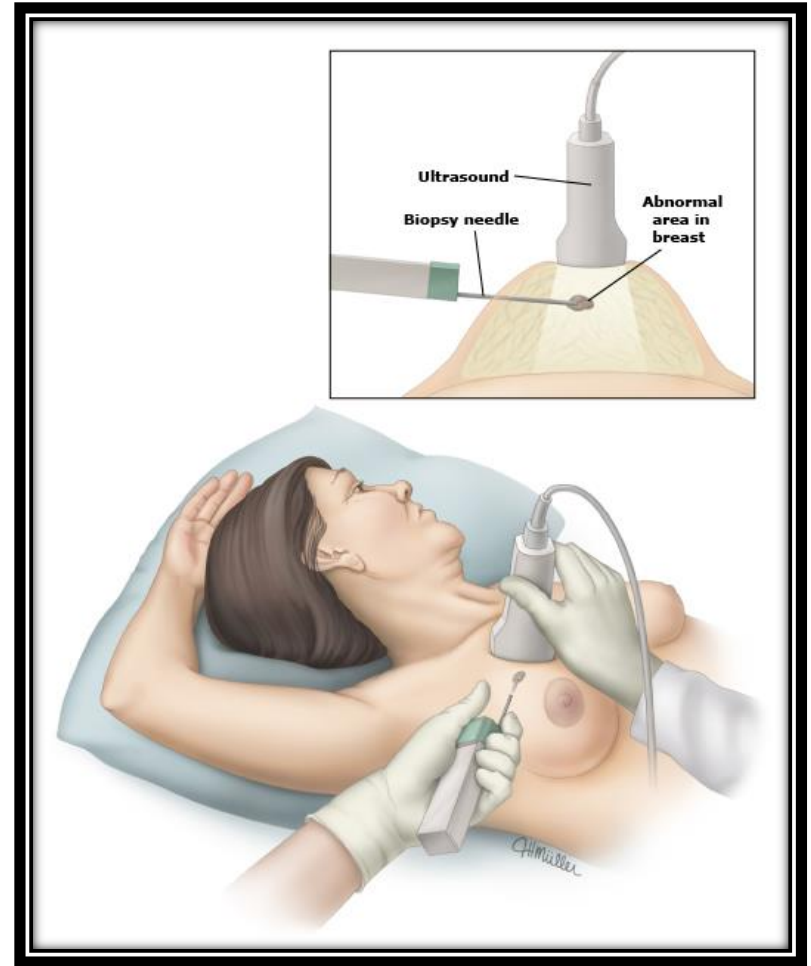

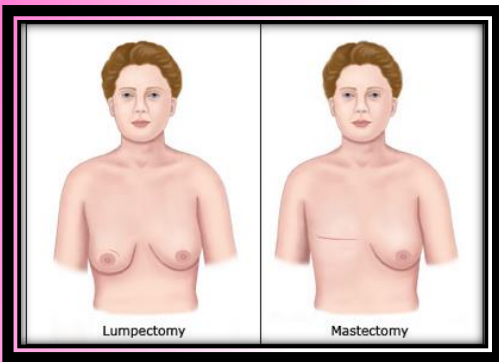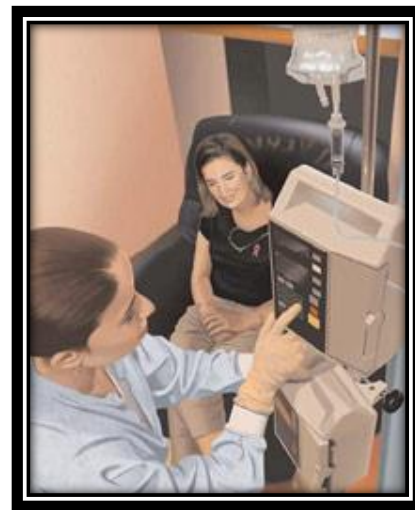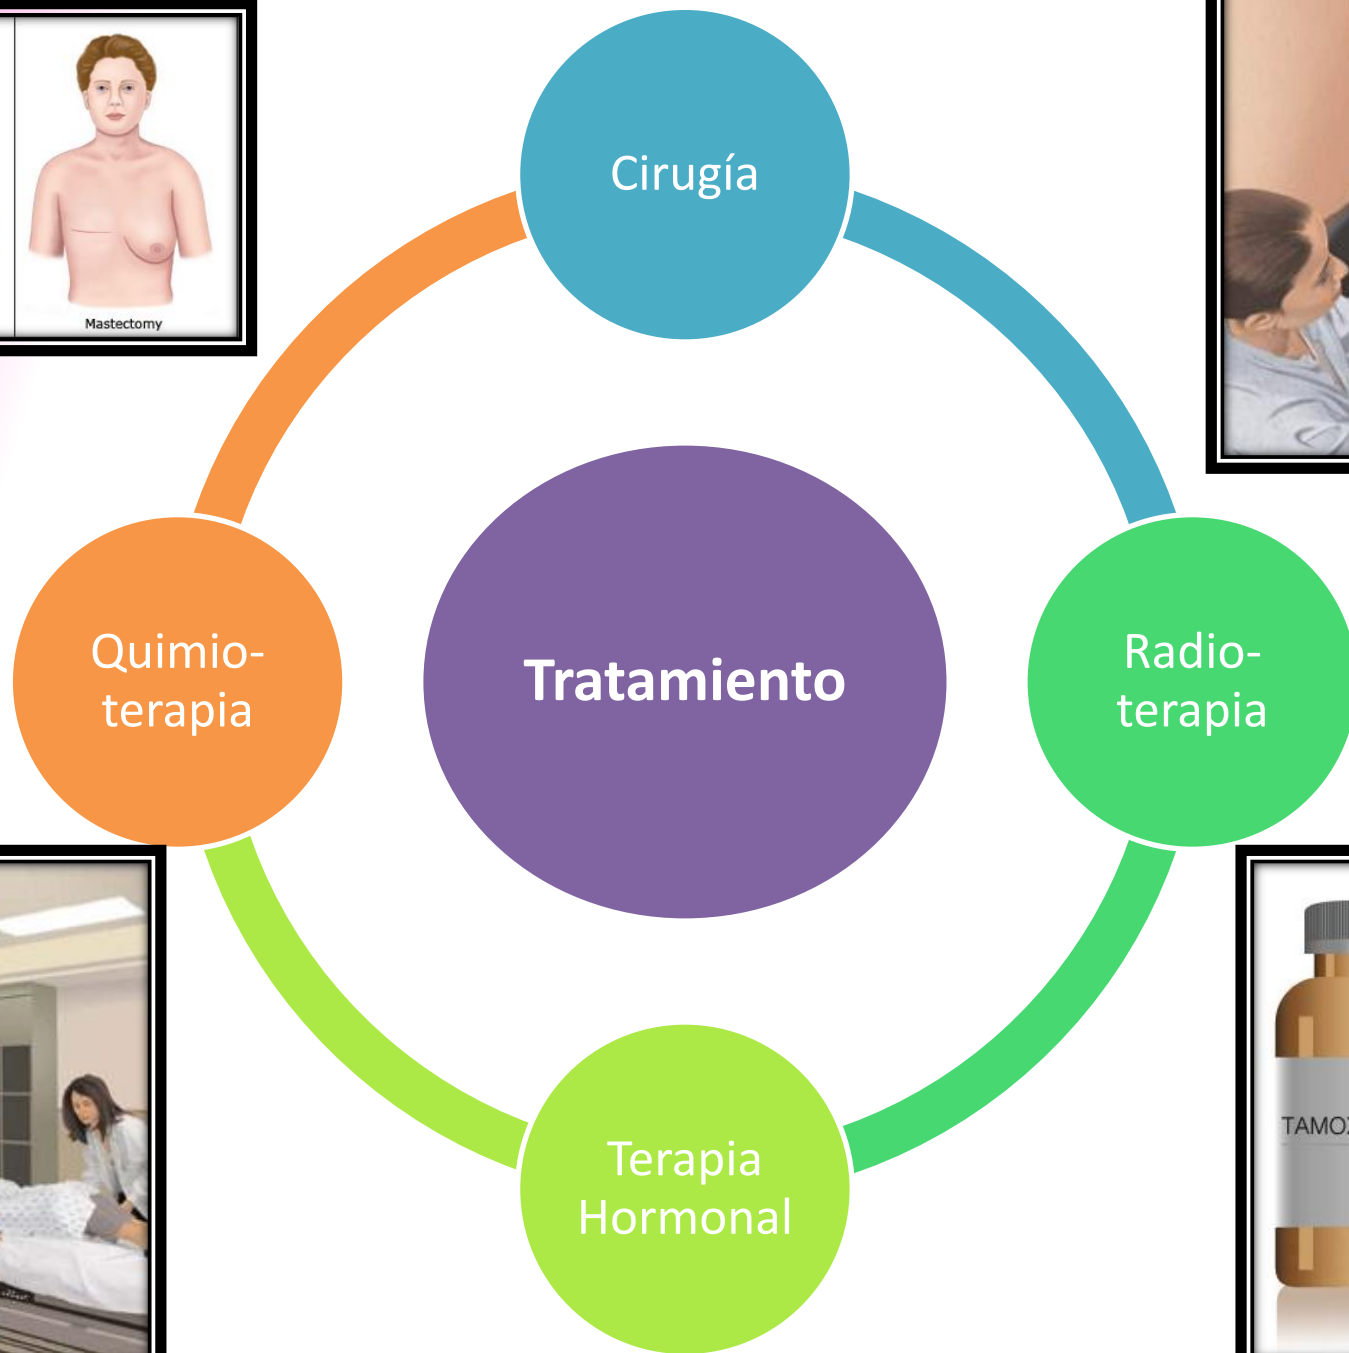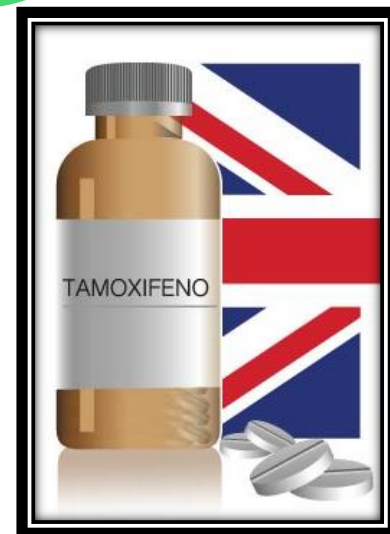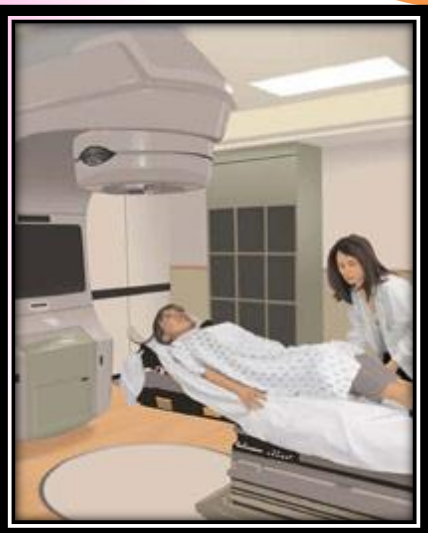

# ¿Qué factores **NO** generan cáncer de mama?

- Golpes o moretones
- El tamaño de los senos
- Aunque ningún familiar haya tenido cáncer, aún existe riesgo
- Algunas niñas y jóvenes pueden tener bolitas que son normales

# MITOS DEL CÁNCER DE MAMA

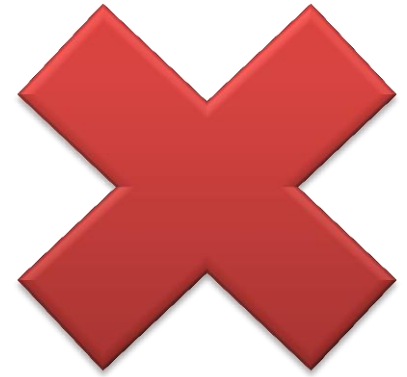

- Los golpes o moretones causan cáncer
- Los desodorantes causan cáncer
- Para tener cáncer de mama es necesario haber tenido una familiar con cáncer de mama
- Todas las bolitas en la mama son anormales en niñas y jóvenes

# MITOS DEL CÁNCER DE MAMA

- Revisarse los senos es algo malo
- Toda la gente con cáncer de mama se muere
- Todas las bolitas en la mama son cáncer
- Las revisiones de mama pueden diseminar el cáncer
- Todos los casos de cáncer de mama necesitan tratarse con mastectomía

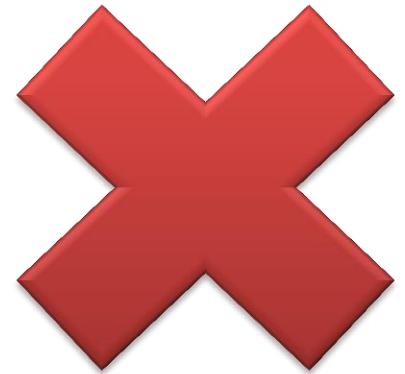

# REALIDADES DEL CÁNCER DE MAMA

- Es importante conocer tus senos para reconocer cambios
- Las pruebas de detección detectan el cáncer antes
- El cáncer de mama se puede tratar si se detecta de manera temprana.

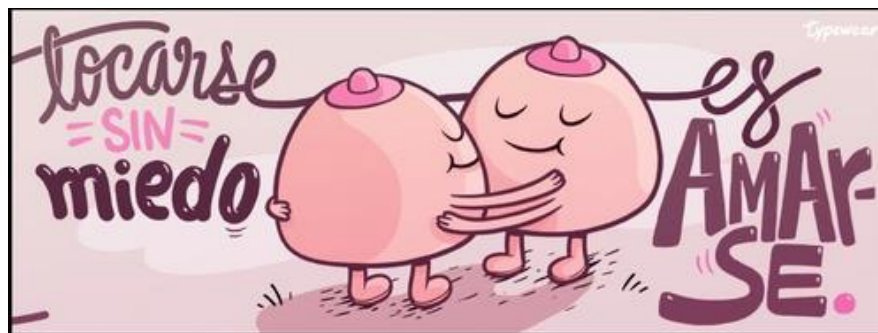



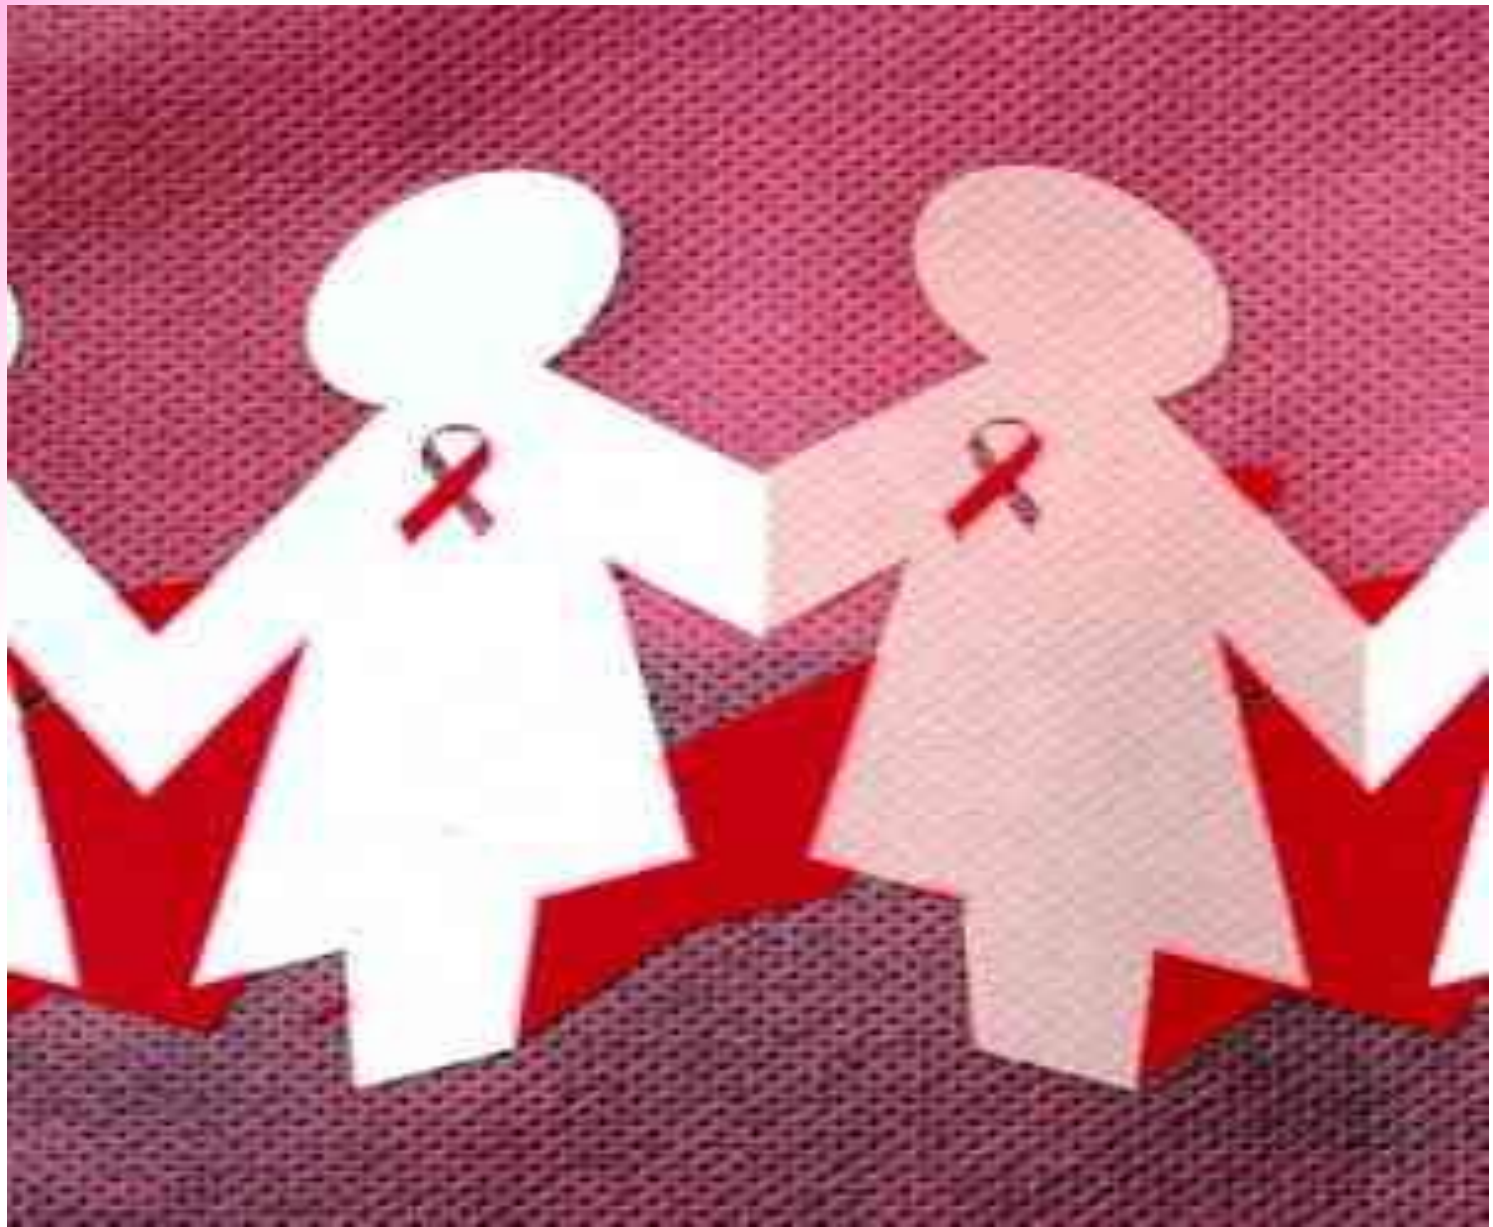

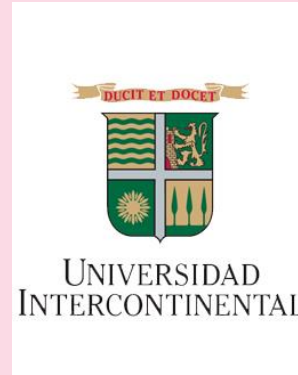

Supplement: supp_the2017-0063_onco12199-sup-0002-suppinfo02.pdf [file supp_the2017-0063_onco12199-sup-0002-suppinfo02.pdf]
