# Supplementary material
Source: PubMed Central journal article supplement (PMC5634772)
Supplement: supp_the2017-0063_onco12199-sup-0001-suppinfo01.pdf [file supp_the2017-0063_onco12199-sup-0001-suppinfo01.pdf]

Supplemental Appendix for:  
Implementation of a school-based educational program to increase breast cancer awareness and promote intergenerational transmission of knowledge in a rural Mexican community  
Enrique Soto-Perez-de-Celis et al.

**Appendix S1**

**Adolescents Acceptability Questionnaire (applied at the end of the educational intervention, T1)**

**Date**

**Dear student**

**Please circle the answer for each of the following statements:**

- |                                             |         |              |      |       |
|---------------------------------------------|---------|--------------|------|-------|
| 1. The activity was interesting             | Nothing | A little bit | Some | A lot |
| 2. The activity helped you learn new things | Nothing | A little bit | Some | A lot |
| 3. The information was clearly presented    | Nothing | A little bit | Some | A lot |
| 4. The presenters knew the topics           | Nothing | A little bit | Some | A lot |
|                                             |         |              |      |       |
| 5. What did you enjoy the most?             |         |              |      |       |
| 6. What did you like the least?             |         |              |      |       |
| 7. Do you have any additional comments?     |         |              |      |       |

Supplemental Appendix for:  
Implementation of a school-based educational program to increase breast cancer awareness and promote intergenerational transmission of knowledge in a rural Mexican community  
Enrique Soto-Perez-de-Celis et al.

**Adolescents Knowledge Questionnaire (applied at T0 before the educational intervention, T1 at the end of the educational intervention and T2, 4 months after the educational intervention)**

**ID Number**

**Date**

**Dear student**

Please mark the answer you consider is correct for each question

1. The risk of having breast cancer increases with age
  - a. True
  - b. False
  - c. I don't know
2. Women with large breasts have more risk of having breast cancer than those with small breasts
  - a. True
  - b. False
  - c. I don't know
3. Bruises and bumps on the breast can cause cancer
  - a. True
  - b. False
  - c. I don't know
4. If no one in your family has had cancer, you have no risk of having it
  - a. True
  - b. False
  - c. I don't know
5. Breast cancer is easier to treat if detected early
  - a. True
  - b. False
  - c. I don't know
6. Women 40 years or older should get a mammogram (breast x-rays) every year
  - a. True
  - b. False
  - c. I don't know

Supplemental Appendix for:  
Implementation of a school-based educational program to increase breast cancer awareness and promote intergenerational transmission of knowledge in a rural Mexican community  
Enrique Soto-Perez-de-Celis et al.

7. It is recommended that women know what is normal for their breasts and tell their doctor if they see any changes
  - a. True
  - b. False
  - c. I don't know
8. Women should get a breast examination from their doctor every three years starting at age 20, and every year starting at age 40
  - a. True
  - b. False
  - c. I don't know
9. I feel comfortable speaking with other members of my family about breast cancer
  - a. Yes
  - b. No
10. Do you know of anyone who has had breast cancer?
  - a. Mother
  - b. Grandmother
  - c. Sister
  - d. Aunt
  - e. Cousin
  - f. Friend
  - g. Other
  - h. No one
  - i. I don't know
11. How old are you?
12. How many members of your household are women?

Supplemental Appendix for:  
Implementation of a school-based educational program to increase breast cancer awareness and promote intergenerational transmission of knowledge in a rural Mexican community  
Enrique Soto-Perez-de-Celis et al.

**Family Members Knowledge Questionnaire (applied at T0 before the educational intervention and at T2, 4 months after the educational intervention)**

**Date**

Dear family member

Please mark the answer you consider is correct for each question

1. The risk of having breast cancer increases with age
  - a. True
  - b. False
  - c. I don't know
2. Women with large breasts have more risk of having breast cancer than those with small breasts
  - a. True
  - b. False
  - c. I don't know
3. Bruises and bumps on the breast can cause cancer
  - a. True
  - b. False
  - c. I don't know
4. If no one in your family has had cancer, you have no risk of having it
  - a. True
  - b. False
  - c. I don't know
5. Breast cancer is easier to treat if detected early
  - a. True
  - b. False
  - c. I don't know
6. Women 40 years or older should get a mammogram (breast x-rays) every year
  - a. True
  - b. False
  - c. I don't know

Supplemental Appendix for:  
Implementation of a school-based educational program to increase breast cancer awareness and promote intergenerational transmission of knowledge in a rural Mexican community  
Enrique Soto-Perez-de-Celis et al.

7. It is recommended that women know what is normal for their breasts and tell their doctor if they see any changes
  - a. True
  - b. False
  - c. I don't know
8. Women should get a breast examination from their doctor every three years starting at age 20, and every year starting at age 40
  - a. True
  - b. False
  - c. I don't know
9. Mammography is free in Mexico
  - a. Yes
  - b. No
10. Do you know the location of the nearest mammogram unit?
  - a. Yes
  - b. No
11. Do you know of anyone who has had breast cancer?
  - a. Mother
  - b. Grandmother
  - c. Sister
  - d. Aunt
  - e. Cousin
  - f. Friend
  - g. Other
  - h. No one
  - i. I don't know
12. How old are you?
